# Supplementary material
Source: HighWire-hosted journal article supplement (https://fg.bmj.com/content/11/5/364)

**SUPPLEMENTARY DATA**

**Supplementary Table 1 – Examples of diseases included in each subgroup.**

**Supplementary Figure S1 – ROC analysis reporting the accuracy of age and alkaline phosphatase for predicting overall mortality.**

Supplementary Table 1

| Grouping                                                                                | N (%)       | Examples (not exhaustive)                                                                                                                            |
|-----------------------------------------------------------------------------------------|-------------|------------------------------------------------------------------------------------------------------------------------------------------------------|
| <b>PEG Subgroups</b>                                                                    |             |                                                                                                                                                      |
| Cognitive Impairment and Depressed Consciousness (CI)                                   | 35 (6.7%)   | Predominantly head injury (e.g. extradural haematoma) following trauma (e.g. road traffic collision)                                                 |
| Mechanical Obstruction to Swallowing (MO)                                               | 95 (18.3)   | Malignant (oesophageal, gastric, metastatic, head and neck cancer) or benign (oesophageal strictures, radiotherapy strictures, external compression) |
| Long Term Partial Failure of Intestinal Function Requiring Supplemental Intake (LTPFIF) | 23 (4.4%)   | Coeliac, Crohn's disease, cystic fibrosis, malabsorption, short bowel syndrome                                                                       |
| Neurological Disorders of Swallowing (NDS)                                              | 281 (54%)   | Motor neurone disease, stroke, multiple sclerosis, Guillain-Barre syndrome, Parkinson's Disease, cerebral palsy                                      |
| Other (O)                                                                               | 86 (16.5%)  | Often ITU admissions, alcohol excess, aspiration pneumonia, for medication delivery                                                                  |
| <b>Neurological Diseases Pathology (PEG Subgroup)</b>                                   |             |                                                                                                                                                      |
| <i>Chronic Stable Neurological Injury (CSNI)</i>                                        | 20 (7.4%)   | <i>Cerebral palsy and learning disability</i>                                                                                                        |
| <i>Acute Neuro-Trauma (ANT)</i>                                                         | 40 (14.8%)  | <i>Predominantly head injury following trauma</i>                                                                                                    |
| <i>Multiple Sclerosis (MS)</i>                                                          | 33 (12.2)   | <i>Multiple sclerosis</i>                                                                                                                            |
| <i>Cerebrovascular Event (CVE)</i>                                                      | 137 (50.7%) | <i>Stroke – ischaemic and haemorrhagic</i>                                                                                                           |
| <i>Motor Neurone Disease (MND)</i>                                                      | 40 (14.8%)  | <i>Motor Neurone Disease</i>                                                                                                                         |
| <b>Gastropepy Subgroup</b>                                                              |             |                                                                                                                                                      |
| Oral/ Pharyngeal Cancer                                                                 | 104 (60.8%) | Tongue, buccal mucosa, tonsil, floor of mouth, soft palate, parotid, oropharynx, nasopharynx                                                         |
| Oesophageal Cancer                                                                      | 44 (25.7%)  | Predominantly squamous cell carcinoma and adenocarcinoma of the oesophagus                                                                           |
| Other Cancer or Benign                                                                  | 23 (13.5%)  | Benign oesophageal strictures, external compression, radiotherapy, cases where a nasal endoscope was necessary                                       |

## Supplementary Figure S1

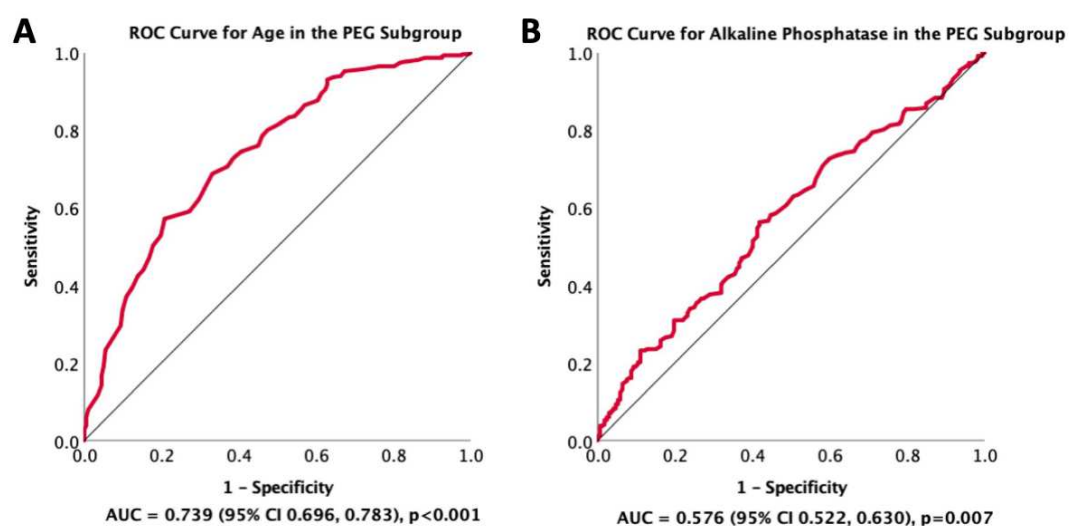

Supplement: inline-supplementary-material-1 [file inline-supplementary-material-1.pdf]
